# Supplementary material for: Will generative AI help solve systematic literature reviews? Evidence from a 2-year research programme
Source: Research Square preprint supplement (doi:10.21203/rs.3.rs-8729984/v1), 2026-02-04
Supplement: Supplementary file 1 [file 29ac856148799fdb9a3352db.docx]

**Will generative AI help solve systematic literature reviews? Evidence from a 2-year research programme**

Saifuddin Kharawala,1 Divyanshu Jindal,1 Sam Isaacs,1 Pankdeep Chhabria,1 Paul Gandhi1

1Bridge Medical Consulting Ltd, Richmond, London, UK

**Additional Table 1. Glossary of terms used**

| **Term** | **Brief description** |
| --- | --- |
| **Accuracy** | In the context of full-text screening, this indicates the fraction of publications correctly identified for inclusion and exclusion by AI during full-text screening among total full texts  In the context of data extraction, accuracy refers to the proportion of correct matches between the data extracted by AI and by the humans |
| **Artificial Intelligence (AI)** | AI is a branch of computer science that aims to create systems capable of performing tasks that normally require human intelligence. These tasks include visual perception, speech recognition, decision-making, and translation between languages |
| **Bidirectional Encoder Representations from Transformers (BERT)** | BERT is a model based on the transformers architecture for NLP pre-training developed by Google. It is designed to help computers understand the meaning of ambiguous language in text by using surrounding text to establish context. The BERT model is pretrained on a large corpus of text and then fine-tuned for specific tasks like question answering or sentiment analysis. Unlike previous models, BERT takes into account the full context of a word by looking at the words that come before and after it—hence it is bidirectional |
| **Completeness** | In the context of data extraction, completeness refers to the extent to which AI successfully extracted data for all the relevant variables |
| **Generative Pretrained Transformer (GPT)** | GPT refers to a series of language processing AI models developed by OpenAI. These models utilise a transformer architecture for deep learning and are pretrained on a vast corpus of text data. The "generative" aspect refers to the model's ability to generate coherent and contextually relevant text based on input prompts. In supervised learning, the algorithm is trained on a predefined set of training examples, which then facilitate its ability to reach an accurate conclusion when given new data. In unsupervised learning, the algorithm is given data without predefined labels and is allowed to find structure in its input on its own |
| **Hugging Face** | Hugging Face is a technology company specialising in NLP and AI. It is best known for its open-source transformers library and platform (https://huggingface.co/), which provides a collection of pretrained models and tools for a variety of NLP tasks |
| **Large Language Models (LLM)** | LLM are a type of AI models that process, understand, generate, and sometimes translate human language. These models are "large" both in terms of the size of their neural network architecture (having a large number of parameters) and the vast amount of data they are trained on. LLMs are often based on transformer architectures and are trained on diverse datasets from the internet or other large text corporations |
| **Machine Learning (ML)** | ML, a subset of AI, involves the development of algorithms that can learn and make predictions or decisions based on data. This learning process is automated and improved upon over time based on experience |
| **Natural Language Processing (NLP)** | NLP is a field at the intersection of computer science, AI, and linguistics. It involves the development of algorithms and systems that enable computers to understand, interpret, and generate human language in a valuable way. Key tasks in NLP include text translation, sentiment analysis, speech recognition, and language generation |
| **Negative predictive value (NPV)** | NPV is the proportion of negative test results that are true negatives. NPV = True Negatives / (True Negatives + False Negatives) |
| **Positive predictive value (PPV)** | PPV is the proportion of positive test results that are true positives. PPV = True Positives / (True Positives + False Positives) |
| **‘Practical’ sensitivity** | In the context of AI-aided ti/ab or full-text screening, we have defined ‘practical’ sensitivity to refer to those true positives that were eventually included for final reporting in the review, i.e., the proportion of final actual positives that were correctly identified as such during AI ti/ab screening or full-text screening |
| **Sensitivity** | Sensitivity measures the proportion of actual positives that are correctly identified as such. Sensitivity = True Positives/ (True Positives + False Negatives) |
| **Systematic literature review (SLR)** | An SLR is a methodical and comprehensive approach to identifying, evaluating, and synthesising all relevant research on a specific topic or research question |
| **Specificity** | Specificity measures the proportion of actual negatives that are correctly identified as such. Specificity = True Negatives / (True Negatives + False Positives) |
| **Targeted literature review (TLR)** | A TLR is a more focused approach than an SLR and is typically used to address specific, often narrower, research questions. A TLR usually does not involve a structured search of the literature, but instead relies on targeted, keyword-based non-exhaustive searches of databases |

AI: artificial intelligence; BERT: bidirectional encoder representations from transformers; GPT: generative pretrained transformer; LLM: large language model; ML machine learning; NLP: natural language processing; NPV: negative predictive value; PPV: positive predictive value; SLR: systematic literature review; ti/ab: title/abstract; TLR: targeted literature review.
