# Supplementary material for: Will generative AI help solve systematic literature reviews? Evidence from a 2-year research programme
Source: Research Square preprint supplement (doi:10.21203/rs.3.rs-8729984/v1), 2026-02-04
Supplement: Supplementary file 2 [file e5e249bc9b353531acd2d396.docx]

Supplementary Material

**Table of Contents**

**S1. Model and Execution Details**

**S2. Prompt Documentation**

**S3. Error Taxonomy**

**S4. Efficiency Assumptions and Calculations**

**S5. Software and Technical Infrastructure**

# S1. Model and Execution Details

All AI models used in this research programme were accessed programmatically via application programming interfaces (APIs) or user interfaces (UIs). **Tables S1A and B** provide comprehensive details of the models used at each stage of the systematic literature review (SLR) workflow.

**Table S1A. AI models and execution details across SLR stages**

| **Stage** | **Model name** | **Provider** | **Exact API identifier / version** | **Access method** | **Date range of runs** |
| --- | --- | --- | --- | --- | --- |
| Title/abstract screening | Fine-tuned BERT-family models | Hugging Face | Multiple architectures | API | Q2–Q3 2023 |
| Title/abstract screening | GPT-4 | OpenAI | gpt-4-0613 | API | Q2–Q3 2023 |
| Full-text screening | GPT-4 Turbo | OpenAI | gpt-4-turbo-2024-04-09 | API | Q2 2024 |
| Data extraction | o3-mini | OpenAI | o3-mini | UI | Q1–Q2 2025 |
| Table narratives | o1-preview | OpenAI | o1-preview-2024-09-12 | API | Q3–Q4 2024 |

**Table S1B. Details of the BERT models**

| **Stage** | **Model name** | **Provider** | **Access method** |
| --- | --- | --- | --- |
| Title/abstract screening | BiomedNLP-PubMedBERT-base-uncased-abstract-fulltext | Hugging Face / BiomedNLP | API |
| Medicalai/ClinicalBERT | Hugging Face / MedicalAI | API |
| BiomedVLP-CXR-BERT-general | Hugging Face / BiomedVLP | API |
| BERT-base-uncased | Hugging Face / Google | API |

**Note on BERT models used for title/abstract (ti/ab) screening:**

For the ti/ab screening evaluation conducted in Q2–Q3 2023, multiple BERT-based transformer models were fine-tuned on in-house labelled biomedical datasets using Hugging Face AutoTrain, a managed training platform. Models tested included biomedical domain-specific architectures (BiomedNLP-PubMedBERT, BiomedVLP-CXR-BERT, ClinicalBERT) and general-purpose transformers (BERT-base-uncased).

Fine-tuning was performed using criterion-wise binary classifiers (one model per population, intervention, comparison, outcome [PICOS] screening element), with training set sizes ranging from 500 to 5,000 labelled citations per model. AutoTrain automatically managed hyperparameter optimisation, random seed initialisation, and model selection based on validation performance metrics (accuracy, precision, recall, area under the curve [AUC], F1).

**Performance on validation datasets:** Fine-tuned models achieved validation F1 scores ranging from 84% to 99% depending on training data source, model architecture, and training set size.

**Model selection for evaluation:** Final models deployed for title/abstract screening evaluation (reported in main manuscript **Table 5**) were selected based on validation performance with preference for maximising recall (sensitivity) to minimise false negatives, consistent with SLR best practices.

# S2. Prompt Documentation

Prompts were developed iteratively for each SLR stage and refined using pilot datasets to align with the SLR requirements. The prompts presented below are representative examples from the evaluation period (2023–2025). They illustrate the structure, instructions, and decision logic employed, but do not constitute an exhaustive set. Prompts were customised for each SLR based on specific research questions, PICOS criteria, and data extraction requirements.

## S2.1 Title/Abstract Screening

Ti/ab screening prompts were designed to classify citations as 'INCLUDE' or 'EXCLUDE' based on PICOS criteria. Prompts were optimised to maximise sensitivity, explicitly instructing the model to default to 'INCLUDE' when uncertainty existed.

**Example S1. Representative prompt structure for title/abstract screening**

**Prompt template (redacted):**

As a classification assistant, your role is to 'INCLUDE' biomedical academic papers based on where [DISEASE/CONDITION] is one of the multiple conditions being evaluated or 'EXCLUDE' otherwise.

'INCLUDE' should be the response when {INCLUDE_DESCRIPTION}.

- Look for words like {INCLUDE_CLUES}.

'EXCLUDE' should be the response when [EXCLUDE_DESCRIPTION].

You are provided with the title and abstract of the paper.

Based on this, determine whether the paper is relevant by answering either 'INCLUDE' or 'EXCLUDE' only.

Be aware that the terms mentioned are not definitive identifiers and should be used in conjunction with the overall context of the paper.

If you are unsure, please answer {DEFAULT_CATEGORY} rather than guessing.

--

DEFAULT_CATEGORY: {‘INCLUDE’}

INCLUDE_DESCRIPTION: [Supporting description]

EXCLUDE_DESCRIPTION: [Description of why the abstract should be excluded]

INCLUDE_CLUES: {List of keywords}

--

Abstract: {query}

Response:

## S2.2 Full-Text Screening

Full-text screening prompts were designed to extract PICOS-relevant information from full publications using structured question sets. The prompts incorporated **self-consistency prompting (SCP)** and **few-shot prompting (FSP)** as complementary methodological frameworks to improve decision stability and accuracy.

**Prompt architecture:**

The FTS prompt template consisted of four integrated components:

1. **Task definition and output format specification**
2. **Methodological framework instructions** (SCP or FSP)
3. **Few-shot examples demonstrating reasoning patterns**
4. **PICOS-specific question set with structured output schema**

**Example S2. Representative prompt structure for full-text screening**

ROLE AND TASK:

[Instructions defining the LLM's identity and objective for biomedical data extraction]

-----------------------------------------------------------------------------------------

ANSWER FORMAT:

[Specifications for the structured output, including "Answer" and "Chain of Thought" fields]

-----------------------------------------------------------------------------------------

METHODOLOGICAL FRAMEWORK:

Self-Consistency Prompting (SCP):

[Guidelines for generating and comparing multiple interpretations to derive a consistent answer]

Few-Shot Prompting (FSP):

[Instructions to learn reasoning style and formatting from provided examples]

-----------------------------------------------------------------------------------------

FEW-SHOT EXAMPLES (Reasoning Templates):

Example 1: [Placeholder for a specific reasoning example structure]

Example 2: [Placeholder for another specific reasoning example structure]

-----------------------------------------------------------------------------------------

JSON OUTPUT SCHEMA:

[Specification of the required JSON structure for each question's answer and chain of thought]

-----------------------------------------------------------------------------------------

Text Content:

{text}

-----------------------------------------------------------------------------------------

QUESTIONS:

Question 1: [Specific domain-related extraction criterion]

[Instruction to apply self-consistency with multiple interpretations]

-----------------------------------------------------------------------------------------

MISSING INFORMATION HANDLING AND OTHER GENERAL INSTRUCTIONS:

[Instructions for reporting unavailable information and providing a brief, evidence-based justification]

-----------------------------------------------------------------------------------------

## S2.3 Data Extraction

Data extraction prompts were designed to systematically extract study-level and outcome-level information from full publications into structured tabular formats. Prompts specified the exact variables to be extracted, their definitions, acceptable formats, and output structure.

**Example S3. Representative prompt structure for data extraction**

TASK:

Extract data from the attached documents into a table, with a single row and multiple columns as per the example template provided.

OR
Extract data from the attached study into a table with the following VARIABLES, with one row per study treatment (there can be multiple rows if a study has multiple treatments):

VARIABLE DEFINITIONS AND OUTPUT FORMAT:

[VARIABLE_1]: {DEFINITION_AND_FORMAT_SPECIFICATION_1}

[VARIABLE_2]: {DEFINITION_AND_FORMAT_SPECIFICATION_2}

[VARIABLE_3]: {DEFINITION_AND_FORMAT_SPECIFICATION_3}

...

[VARIABLE_N]: {DEFINITION_AND_FORMAT_SPECIFICATION_N}

[STUDY_IDENTIFIER]: Trial name or acronym as reported in publication

[SAMPLE_SIZE]: Number of patients randomised/enrolled/eligible (numeric)

[STUDY_PHASE]: Phase I / Phase II / Phase III / Phase IV / Not specified

[INCLUSION_CRITERIA_AGE]: Age-related inclusion criteria (free text)

[INCLUSION_CRITERIA_DIAGNOSIS]: Diagnostic criteria for [DISEASE/CONDITION] (free text)

[DISEASE_STAGE]: [DISEASE-SPECIFIC STAGING CRITERIA] (free text)

[INTERVENTION_NAME]: List name(s) of intervention(s)

[COMPARATOR_CLASS]: Active only / Placebo only / Active & placebo / [OTHER_OPTIONS] / NA

[FOLLOW_UP_DURATION]: Specify mean/median as applicable (in the same unit as reported)

[STATISTICAL_METHODS]: Statistical analysis methods used (free text)

**Variables example from clinical trial SLR:**

The extraction template included variables across the following categories:

- **Study metadata**: Study identifier, publication type, National Clinical Trial (NCT) registration ID, linked publications
- **Study methodology**: Study design, randomisation approach, blinding, study phase, data collection period, follow-up duration, geographic setting
- **Population characteristics**: Sample size, inclusion criteria (age, diagnosis, performance status, prior treatment, disease stage), exclusion criteria
- **Intervention details**: Intervention name(s), abbreviations, dosing regimen
- **Comparator details**: Comparator class, comparator name(s), abbreviations
- **Outcomes**: Disease/condition-specific efficacy, safety, and health-related quality of life (HRQoL) outcomes, redacted
- **Other study details**: Power calculation, statistical analysis methods, sponsor information, authors' conclusions

**Note:** The example provided above reflects the prompt architecture used for clinical trial SLRs conducted in 2025 using o3-mini. Variable sets, definitions, and output structures were fully customised for each SLR and outcome based on the research question, study design focus (clinical trials vs. real-world evidence), therapeutic area, and downstream analysis requirements. Real-world evidence SLRs typically involved fewer, but more complex, variables extracted into narrative-format data tables rather than highly structured extraction grids.

## S2.4 Table Narratives

Narrative generation prompts instructed the model to synthesise information from structured summary tables into coherent, accurate textual summaries.

**Example S4. Representative prompt structure for table narrative generation**

ROLE AND TASK:

[Instructions defining the LLM's role as a scientific research expert and its primary summarisation objective]

-----------------------------------------------------------------------------------------

GENERAL INSTRUCTIONS:

[Overall directives for summary writing style, introduction, detail level, exclusion of external information, and reference formatting]

-----------------------------------------------------------------------------------------

SPECIFIC INSTRUCTIONS (Paragraph-by-Paragraph Structure):

[Paragraph 1 SPECIFIC CONTEXT]:

[Paragraph 2 SPECIFIC CONTEXT]:

…

[Paragraph N SPECIFIC CONTEXT]:

For [OUTCOME_TYPE_1]:

[Specific instructions for the Outcome]

...

For [OUTCOME_TYPE_N]:

[Specific instructions for the Outcome]

Final Instructions:

-----------------------------------------------------------------------------------------

EXAMPLE NARRATIVE STRUCTURE:

{EXAMPLE_NARRATIVE_PROVIDED_AS_TEMPLATE}

**Note:** The example provided above reflects the prompt architecture used for real-world evidence SLRs conducted in 2024 using o1-preview. Narrative prompts were highly customised for each table type (e.g., mortality, treatment patterns, disease burden, HRQoL) and therapeutic area. The few-shot example narrative provided within the prompt was tailored to match the structure and reporting conventions of the target table, ensuring alignment with the SLR's overall narrative style and scientific framing.

# S3. Error Taxonomy

To systematically characterise AI performance limitations across different SLR stages, we developed stage-specific error classification frameworks, focused on the most relevant performance parameters as per each SLR stage. This section presents error taxonomies for ti/ab screening, full-text screening, data extraction, and table narrative generation.

## S3.1 Error Classification Framework for Title/Abstract and Full-Text Screening

For screening tasks (ti/ab and full-text screening), the primary quality metrics are sensitivity and specificity, which determine whether relevant studies are correctly identified (minimising false negatives) and irrelevant studies are correctly excluded (minimising false positives). Given the critical importance of not missing relevant evidence in systematic reviews, our evaluation framework prioritised **'practical' sensitivity** as the most clinically meaningful metric.

### S3.1.1 Performance Metrics: Definitions and Clinical Interpretation

**Sensitivity** measures the proportion of all truly relevant citations identified by AI during screening:

**Sensitivity = TP / (TP + FN)**

However, in the context of SLRs, a more pragmatic and clinically relevant metric is **'practical' sensitivity**, which we define as:

**'Practical' Sensitivity = TP_final / (TP_final + FN_final)**

where:

- **TP_final** = Citations that were (a) correctly included by AI during ti/ab or full-text screening, AND (b) ultimately included in the final evidence synthesis and reporting
- **FN_final** = Citations that were (a) incorrectly excluded by AI during ti/ab or full-text screening, BUT (b) would have been included in the final evidence synthesis had they been identified

**Rationale for 'Practical' Sensitivity:**

Standard sensitivity treats all screening-stage true positives equally, regardless of whether they ultimately contribute to the final SLR. However, many citations correctly included at ti/ab screening are subsequently excluded during full-text screening or data extraction following more detailed PICOS assessment, and based on key research objectives. **'Practical' sensitivity** focuses specifically on those studies that **actually matter for the final evidence synthesis**; i.e., studies that were eventually used for data reporting. This metric provides a more realistic assessment of the clinical and methodological impact of false negatives.

**Specificity** measures the proportion of truly irrelevant citations correctly excluded by AI:

**Specificity = TN / (TN + FP)**

High specificity translates directly to **workload reduction**, as it reflects the proportion of irrelevant citations that can be confidently excluded without requiring human review.

## S3.2 Error Classification Framework for Data Extraction

For data extraction tasks, errors were classified by type (completeness vs. accuracy).

- **Completeness:** The extent to which AI successfully extracted data for all the relevant variables
- **Accuracy:** The proportion of correct matches between the data extracted by AI and by the humans

**Table S2. Error classification framework for AI-assisted data extraction**

| **Error category** | **Subcategory** | **Definition** |
| --- | --- | --- |
| **Completeness errors** | Missing data element | AI failed to extract a data element that was present in the source |
|  | Missed subgroup | AI extracted aggregate data but failed to extract subgroup-specific data |
|  | Missed outcome | AI failed to extract data for a relevant outcome reported in the source |
|  | Incomplete extraction | AI extracted partial information but missed key details (e.g., extracted point estimate but not confidence interval) |
| **Accuracy errors** | Incorrect numerical value | AI extracted an incorrect numerical value (e.g., transcription error, misidentified column/row) |
|  | Incorrect categorical assignment | AI assigned incorrect category (e.g., wrong study design, wrong treatment arm) |
|  | Unit error | AI extracted correct numerical value but incorrect unit |
|  | Misattribution | AI correctly extracted data but attributed it to the wrong study, subgroup, or time point |

## S3.3 Error Classification Framework for Table Narrative Generation

For table narrative generation, errors were classified using a structured evaluation framework developed in-house that assessed both **objective quality dimensions** and **overall subjective utility**. Unlike screening and extraction tasks, where errors can be categorised as discrete false positives/negatives or missing/incorrect data points, narrative evaluation required assessment of synthesised textual outputs against multiple quality criteria.

The **in-house evaluation framework** developed operationalised narrative quality assessment through four primary objective dimensions—**Completeness**, **Data Accuracy**, **Hallucinations**, and **Qualitative Conclusions**—each with differential penalty weighting to reflect relative consequence for evidence synthesis integrity. The framework structure is presented in **Figure 5** of the main manuscript.

**Table S3. Error classification framework for AI-generated table narratives**

| **Error dimension** | **Definition** | **Scoring criteria** | **Penalty weighting** |
| --- | --- | --- | --- |
| **Completeness** | Coverage of all key sub-questions and summary key results presented in the source table | - Fully complete: **0 points** (no penalty) - Missing key results: **+5 points per omission** | Moderate |
| **Data Accuracy** | Presence of any inaccurate data findings in the generated narrative | - No inaccuracy: **0 points** - Minor inaccuracy: **+1 point per instance** - Major inaccuracy: **+5 points per instance** | Moderate to High (severity-dependent) |
| **Hallucinations** | Inclusion of data, findings, or claims that are completely new to the summary (i.e., not present in the source table) | - No hallucination: **0 points** - Minor hallucination: **+5 points per instance** - Major hallucination: **+10 points per instance** | **High to Very High** |
| **Qualitative Conclusions** | Presence of any inaccurate qualitative conclusions drawn from the data | - No inaccuracy: **0 points** - Key conclusion missing: **+1 point per omission** - Key conclusion incorrect: **+5 points per instance** | High |

**Overall Objective Score:** Sum of penalty points across all four dimensions. Lower scores indicate higher quality.

- **0–14 points:** High quality
- **15–34 points:** Moderate quality
- **≥35 points:** Low quality

**Subjective Quality Assessment:**

In addition to the objective scoring framework, each AI-generated narrative received an independent **subjective quality rating** (Good / Medium / Poor) from a senior outcomes research scientist. This assessment evaluated whether the narrative was:

- **Concise and coherent** (appropriate length and logical flow)
- **Accurate and evidence-aligned** (faithful representation of source table)
- **Useful for decision-making** (clarity, interpretability, actionable insights)

The subjective rating provided a holistic, expert-informed judgement that complemented the structured objective scoring, capturing qualities such as readability, narrative coherence, and practical utility that are not fully captured by penalty-based metrics alone.

# S4. Efficiency Assumptions and Calculations

This section details the assumptions and methodology used for the exploratory objective to estimate efficiency gains for each SLR stage evaluated in this study.

## S4.1 General Principles

Efficiency calculations were based on controlled internal time-tracking data collected during the execution of reference SLRs (gold-standard human workflows) and during AI-assisted workflows implemented in the evaluation phase. Time estimates reflect:

1. **Direct execution time (Gross benefit):** The time required for AI to complete the core task autonomously, compared to the time required for manual human execution (e.g., screening a citation, extracting data from a publication, generating a table narrative).
2. **Overhead time:** Time required for AI pre-processing (e.g., PDF parsing, input preparation), AI post-processing (e.g., output formatting, application of hierarchical screening algorithms), and prompt refinement (one-time setup cost amortised across all units).
3. **Human quality control (QC) time:** Time required for expert review, validation, and correction of AI outputs.

Efficiency is reported as:

- **Gross time savings:** Reduction in direct execution time when AI performs the task autonomously, excluding all overhead and QC.
- **Net time savings:** Reduction in total time when accounting for AI execution, pre- and post-processing overhead, and human QC.

## S4.2 Title/Abstract Screening

**Time assumptions (per title/abstract):**

| **Workflow component** | **Time per ti/ab** |
| --- | --- |
| Human screening (manual) | 2 minutes |
| AI screening (direct execution) | 2 seconds |
| AI pre- and post-processing | 9 seconds per ti/ab* |
| Human validation/QC | 51 seconds per ti/ab |

*Pre- and post-processing includes prompt application, hierarchical PICOS algorithm execution, and output formatting.

**Gross time savings:**
Gross savings = (Human time − AI direct time) / Human time
Gross savings = (2 min − 2 sec) / 2 min = **98%**

**Net time savings:**
Total AI-assisted workflow time = AI direct (2 sec) + Pre/post-processing (9 sec) + Human QC (51 sec) = 62 seconds
Net savings = (2 min − 62 sec) / 2 min = (120 sec − 62 sec) / 120 sec = **52%**

## S4.3 Full-Text Screening

**Time assumptions (per full text):**

| **Workflow component** | **Time per full text** |
| --- | --- |
| Human screening (manual) | 10 minutes |
| AI screening (direct execution) | 1 minute |
| AI pre- and post-processing | 1 minute* |
| Human validation/QC | 8 minutes |

*Pre- and post-processing includes PDF parsing, prompt application, and output formatting.

**Gross time savings:**
Gross savings = (10 min − 1 min) / 10 min = **94%**

**Net time savings:**
Total AI-assisted workflow time = AI direct (1 min) + Pre/post-processing (1 min) + Human QC (8 min) = 10 minutes
Net savings = (10 min − 10 min) / 10 min = **2%**

For full-text screening, the AI-assisted workflow provided **minimal time efficiency gains (2% net time savings)** but delivered substantial **quality assurance value** through near-perfect sensitivity (99–100%), ensuring comprehensive evidence capture while maintaining high methodological standards.

## S4.4 Full Data Extraction

Data extraction is the most resource-intensive stage of an SLR and the stage where AI delivered the greatest net efficiency gains.

**Time assumptions (per full text):**

| **Workflow component** | **Time per full text** |
| --- | --- |
| Human extraction (manual) | 3 hours |
| AI extraction (direct execution) | 10 minutes |
| AI pre- and post-processing | 15 minutes* |
| Human validation/QC | 45 minutes |

*Pre- and post-processing includes PDF parsing, input preparation, and output formatting.

**Gross time savings:**
Gross savings = (3 hours − 10 min) / 3 hours = (180 min − 10 min) / 180 min = **94%**

**Net time savings:**
Total AI-assisted workflow time = AI direct (10 min) + Pre/post-processing (15 min) + Human QC (45 min) = 70 minutes
Net savings = (180 min – 70 min) / 180 min = **61%**

**SLR-level efficiency (example: 100 publications):**

- Traditional workflow total time: 3 hours × 100 = 300 hours
- AI-assisted workflow total time: 70 min × 100 = 117 hours
- **Net time savings: 183 hours (61%)**

## S4.5 Table Narrative Generation

**Time assumptions (per table narrative):**

| **Workflow component** | **Time per narrative** |
| --- | --- |
| Human narrative writing (manual) | 8 hours |
| AI narrative generation (direct execution) | 10 minutes |
| AI pre- and post-processing | 45 minutes* |
| Human validation/QC | 2 hours 15 minutes |

*Pre- and post-processing includes table content formatting and prompt application.

**Gross time savings:**
Gross savings = (8 hours − 10 min) / 8 hours = (480 min − 10 min) / 480 min = **98%**

**Net time savings:**
Total AI-assisted workflow time = AI direct (10 min) + Pre/post-processing (45 min) + Human QC (135 min) = 155 minutes
Net savings = (480 min − 155 min) / 480 min = **63%**

## S4.6 Efficiency Summary Table

**Table S4. Summary of time savings across SLR stages**

| **SLR stage** | **Human time per unit** | **AI direct time per unit** | **AI pre/post-processing per unit** | **Human QC time per unit** | **Total AI-assisted time per unit** | **Gross time savings** | **Net time savings** |
| --- | --- | --- | --- | --- | --- | --- | --- |
| Ti/ab screening | 2 min/ti/ab | 2 sec/ti/ab | 9 sec/ti/ab | 51 sec/ti/ab | 62 sec/ti/ab | 98% | 52% |
| Full-text screening | 10 min/FT | 1 min/FT | 1 min/FT | 8 min/FT | 10 min/FT | 94% | 2% |
| Full data extraction | 3 hrs/FT | 10 min/FT | 15 min/FT | 45 min/FT | 70 min/FT | 94% | 61% |
| Table narratives | 8 hrs/narrative | 10 min/narrative | 45 min/narrative | 2 h 15 min/narrative | 3 h 10 min/narrative | 98% | 63% |

# S5. Software and Technical Infrastructure

This section summarises the software and infrastructure used to execute the AI-assisted SLR workflows at a high level, focusing on reproducibility while avoiding disclosure of proprietary implementation details.

## S5.1 Implementation Overview

All AI-assisted stages were executed using reproducible Python 3.x workflows (scripts and notebooks) that orchestrated model calls, document parsing, and structured output generation. Proprietary LLMs were accessed via vendor-hosted APIs (see **Table S1** for model identifiers and run windows). BERT-family models were trained and evaluated using standard transformer tooling and a managed training service.

Full-text inputs (PDFs and associated supplements) were converted to machine-readable text using a deterministic parsing pipeline. Outputs (screening decisions, extracted variables, and evaluation results) were stored as structured files (e.g., XLSX/CSV/JSON), model identifier, and execution date.

## S5.2 Reproducibility

Reproducibility is supported through reporting of model identifiers (**Table S1**), representative prompt templates (Section S2).
